# Supplementary material for: A Cluster-Randomized Controlled Trial to Reduce Diarrheal Disease and Dengue Entomological Risk Factors in Rural Primary Schools in Colombia
Source: PLoS Negl Trop Dis. 2016 Nov 7;10(11):e0005106. doi: 10.1371/journal.pntd.0005106 (PMC5098800; doi:10.1371/journal.pntd.0005106)
Supplement: S3 Dataset — (CSV) [file pntd.0005106.s006.csv]

ESCUELA	DIAS.OBSERVA	DiasDengue	EpisodiosDengue	Intervenci�n	TasaEpisodiosAnual	TasaDiasAnual	Municipio	DengueInterv	DiarrhInterv
AN02	3180	0	0	1.Dengue	0	0	A	1	0
AN03	9798	0	0	2.Diarrea	0	0	A	0	1
AN04	13549	0	0	1.Dengue	0	0	A	1	0
AN05	4989	0	0	1.Dengue	0	0	A	1	0
AN06	3457	0	0	4.Control	0	0	A	0	0
AN07	8176	1	1	1.Dengue	0.0226272015655577	0.0226272015655577	A	1	0
AN09	4436	0	0	2.Diarrea	0	0	A	0	1
AN10	1859	0	0	2.Diarrea	0	0	A	0	1
AN11	4857	0	0	1.Dengue	0	0	A	1	0
AN12	6429	3	1	3.Denguediarrea	0.028775859387152	0.0863275781614559	A	1	1
AN13	5919	0	0	3.Denguediarrea	0	0	A	1	1
AN14	3972	0	0	3.Denguediarrea	0	0	A	1	1
AN15	10748	1	1	4.Control	0.0172125046520283	0.0172125046520283	A	0	0
AN16	6456	0	0	4.Control	0	0	A	0	0
AN17	4165	0	0	3.Denguediarrea	0	0	A	1	1
AN18	14333	4	1	2.Diarrea	0.0129072769134166	0.0516291076536664	A	0	1
AN19	9739	5	2	4.Control	0.0379915802443783	0.0949789506109457	A	0	0
LM02	15926	1	1	4.Control	0.0116162250408138	0.0116162250408138	M	0	0
LM03	4860	0	0	1.Dengue	0	0	M	1	0
LM05	6468	13	1	1.Dengue	0.0286023500309215	0.371830550401979	M	1	0
LM06	4969	2	1	1.Dengue	0.0372308311531495	0.0744616623062991	M	1	0
LM07	2528	1	1	1.Dengue	0.0731803797468354	0.0731803797468354	M	1	0
LM08	3516	15	2	4.Control	0.105233219567691	0.789249146757679	M	0	0
LM10	10412	0	0	4.Control	0	0	M	0	0
LM12	15373	2	1	4.Control	0.0120340857347297	0.0240681714694594	M	0	0
LM13	7970	0	0	2.Diarrea	0	0	M	0	1
LM14	9826	0	0	1.Dengue	0	0	M	1	0
LM15	15746	2	2	3.Denguediarrea	0.0234980312460307	0.0234980312460307	M	1	1
LM16	22440	11	3	3.Denguediarrea	0.0247326203208556	0.0906862745098039	M	1	1
LM17	4901	0	0	2.Diarrea	0	0	M	0	1
LM18	3221	0	0	3.Denguediarrea	0	0	M	1	1
LM19	4258	12	2	3.Denguediarrea	0.0868952559887271	0.521371535932363	M	1	1
LM20	35397	19	5	2.Diarrea	0.0261321580924937	0.0993022007514761	M	0	1
LM21	3705	5	1	2.Diarrea	0.0499325236167341	0.249662618083671	M	0	1
